# Supplementary material for: Cathepsin B modulates lysosomal biogenesis and host defense against Francisella novicida infection
Source: PubMed Central journal article supplement — J Exp Med. 2016 Sep 19;213(10):2081–97. doi: 10.1084/jem.20151938 (PMC5030800; doi:10.1084/jem.20151938), 2016-09-19
Supplement: JEM_20151938_sm.pdf [file JEM_20151938_sm.pdf]

SUPPLEMENTAL MATERIAL

Qi et al., <http://www.jem.org/cgi/content/full/jem.20151938/DC1>

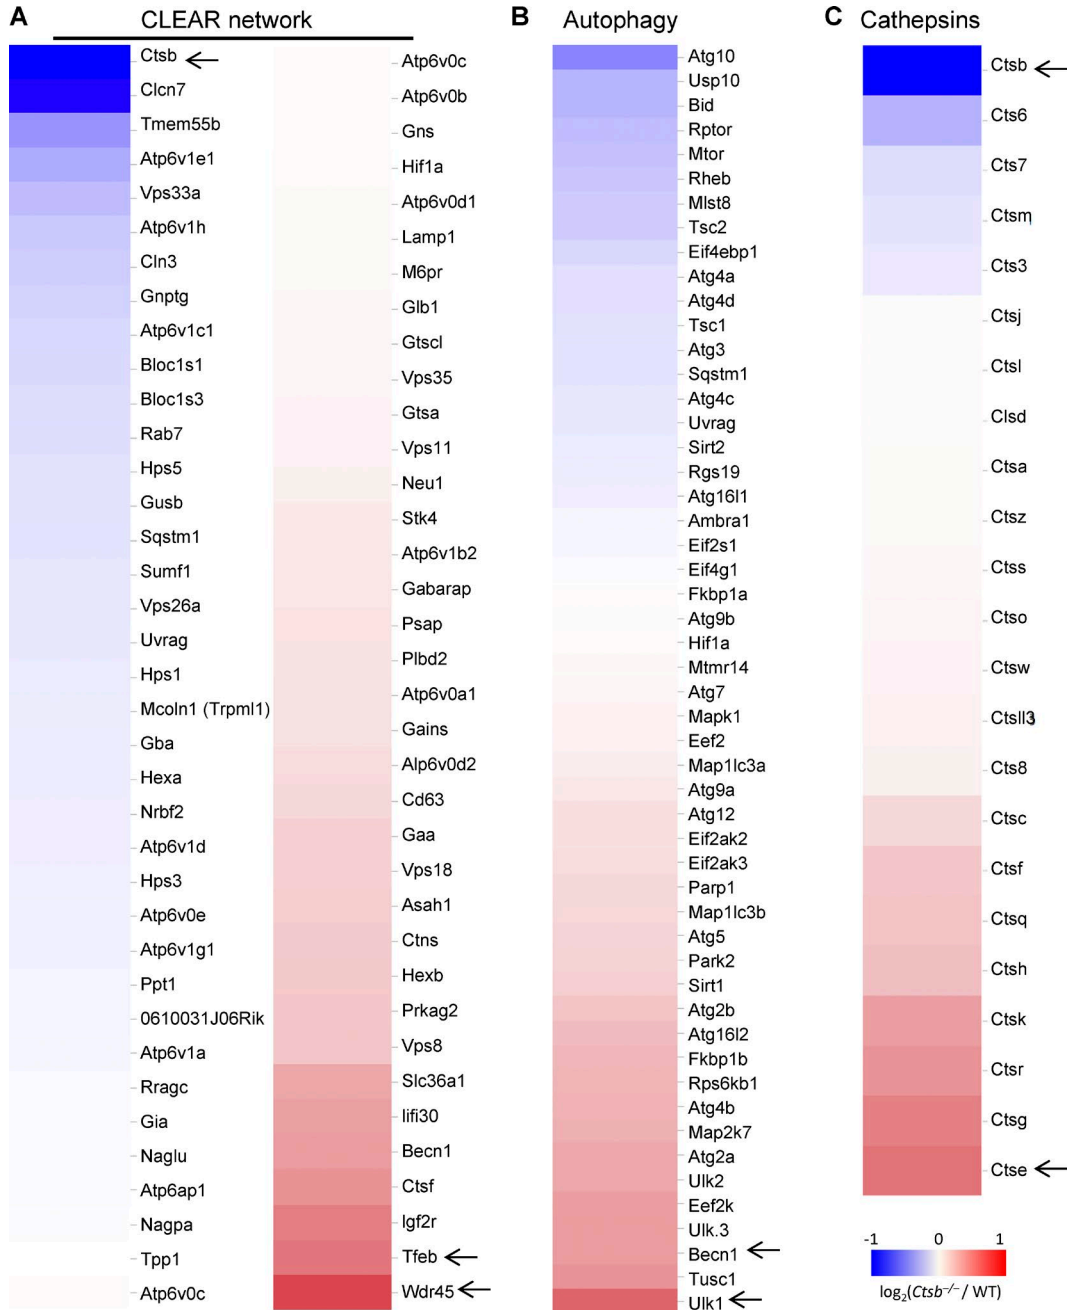

Figure S1. The expression of genes encoding TFEB and its targets are differentially regulated in the absence of cathepsin B. Genome-wide gene expression profiling was performed on WT and *Ctsb*<sup>-/-</sup> BMDMs by microarray analysis. The CLEAR network gene expression (A), autophagy gene expression (B), and lysosomal cathepsins expression (C) were analyzed. Red color indicates gene expression being up-regulated and blue color indicates gene expression being down-regulated in uninfected *Ctsb*<sup>-/-</sup> BMDMs relative to uninfected WT BMDMs.

Table S1. Real-time quantitative PCR primer sequences

| Gene           | 5' primer                 | 3' primer                 |
|----------------|---------------------------|---------------------------|
| <i>Wdr45</i>   | GCCTGGTAGAGATGCTGCAC      | ACTCCAGCACCAGTTTGTCC      |
| <i>Beclin1</i> | CCAGGAACCTCACAGTCCAT      | GGCGAGTTTCAATAAATGGC      |
| <i>Ctsb</i>    | CTTAGGAGTGACGGGAGAG       | GATCAAGGACCACCACATCC      |
| <i>Ctse</i>    | GCCCAACCCATCCACTTACT      | CCTTCCACCCTTCTTCTCCTC     |
| <i>Ulk1</i>    | ATCGTGCCGCTGTATGACTT      | GCAGGTAGTCAGCCAGTCT       |
| <i>iNos</i>    | TGTGACACACAGCGCTACAACA    | GAAACTATGGAGCACAGCCACAT   |
| <i>Lcn2</i>    | ACATTTGTTCCAAGCTCCAGGGC   | CATGGCGAACTGGTTGTAGTCCG   |
| <i>Tfeb</i>    | CAAGGCCTCTGTGATTACA       | GGAGCCAGAGCTGCTTGTTA      |
| <i>Ifnb</i>    | GCCTTTGCCATCCAAGAGATGC    | ACACTGTCTGTGGTGGAGTTC     |
| <i>Trpm1</i>   | GAGCGAGGCTGCAGTGAC        | GGGTCCCATACCCAGGATT       |
| <i>Gapdh</i>   | CGTCCCCTAGACAAAATGGT      | TTGATGGCAACAATCTCCAC      |
| <i>Hprt</i>    | CTCATGGACTGATTATGGACAGGAC | GCAGGTCAGCAAGAAGCTTATAGCC |
